# Supplementary material for: Hollow cube-like CuS derived from Cu2O crystals for the highly efficient elimination of electromagnetic pollution
Source: Royal Society of Chemistry journal article supplement (doi:10.1039/c8nj00488a), 2018-01-01
Supplement: c8nj00488a1.pdf [file c8nj00488a1.pdf]

# ESI

## Hollow cube-like CuS derived from Cu<sub>2</sub>O crystals for the highly efficient elimination of electromagnetic pollution

Xiaodong Sun†<sup>a</sup>, Xin Yuan†<sup>a</sup>, Xiaopeng Li<sup>c</sup>, LingLi<sup>a</sup>, Qingfeng Song<sup>d</sup>,  
Xuliang Lv<sup>a</sup>, Guangxin Gu\*<sup>b</sup> and Mingxu Sui\*<sup>a</sup>

<sup>a</sup> *Key Laboratory of Science and Technology on Electromagnetic Environmental Effects and Electro-optical Engineering, The Army Engineering University, Nanjing, 210007, PR China.*

<sup>b</sup> *Department of Materials Science, Fudan University, Shanghai, 200433, PR China.*

<sup>c</sup> *National University of Defense Technology, Xi'an, 710106, PR China.*

<sup>d</sup> *Troops 96657 of PLA, Beijing, 100011, PR China.*

Corresponding authors: [Guangxingu@fudan.edu.cn](mailto:Guangxingu@fudan.edu.cn) (Guangxin Gu)

Figure S1 shows the Schematic illustration of the formation mechanism of the hollow cube-like CuS.

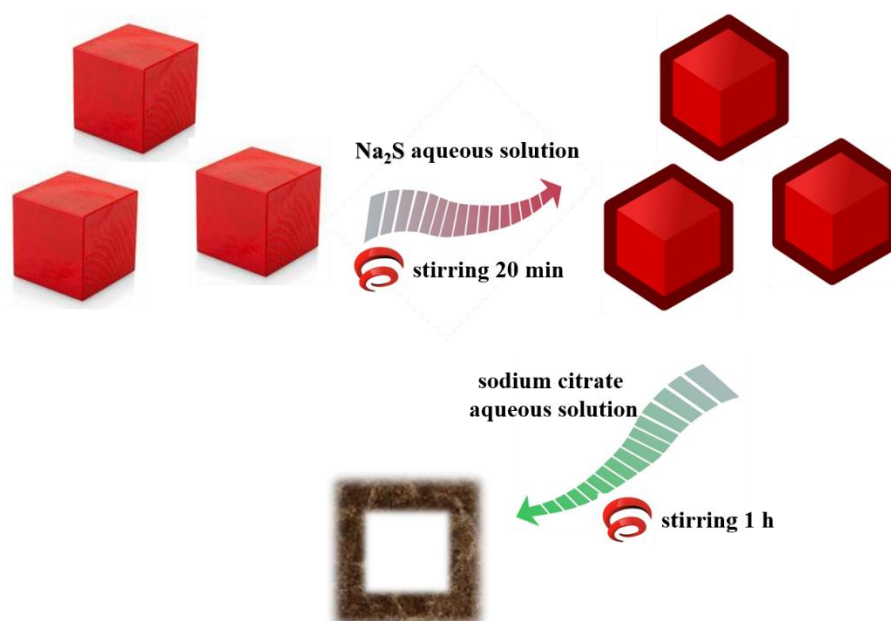

**Fig. S1.** The proposed formation process of the hollow cube-like CuS.

In Fig. S2, EDS patterns of Cu<sub>2</sub>O and CuS are displayed. In Fig. S2a, it can be found that the as-obtained Cu<sub>2</sub>O is made up of Cu and O elements. Table S1 shows that the atomic ratio of Cu: O is 38.29: 61.71, which is close to the chemical stoichiometry of Cu<sub>2</sub>O. In Fig. S2b, the EDS result indicates the presence of Cu and S, and the atomic ratio of Cu: S is 50.33: 49.67. As a whole, the EDS results have given approximate components contents, which contribute to analysis of material's property.

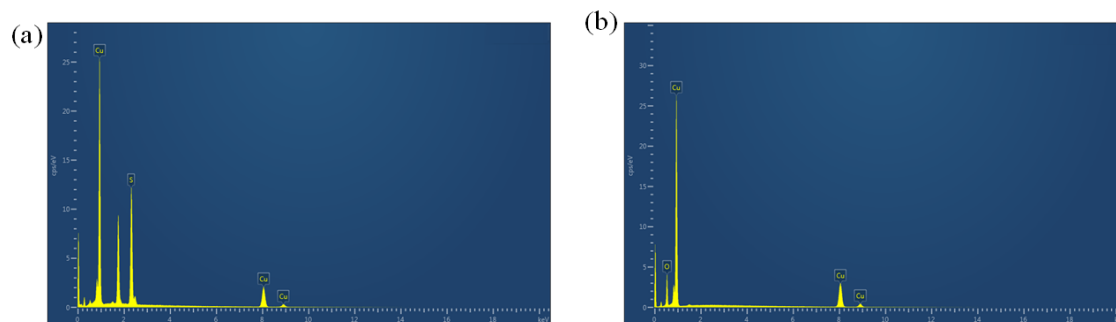

**Fig. S2.** EDS patterns of Cu<sub>2</sub>O (a) and CuS (b).

Table S1. EDS results of Cu<sub>2</sub>O and CuS.

| Sample            | Elements | Wt%   | At%   |
|-------------------|----------|-------|-------|
| Cu <sub>2</sub> O | Cu       | 13.51 | 38.29 |
|                   | O        | 86.49 | 61.71 |
|                   | total    | 100   | 100   |
| Sample            | Elements | Wt%   | At%   |
| CuS               | Cu       | 33.83 | 50.33 |
|                   | S        | 66.17 | 49.67 |
|                   | total    | 100   | 100   |

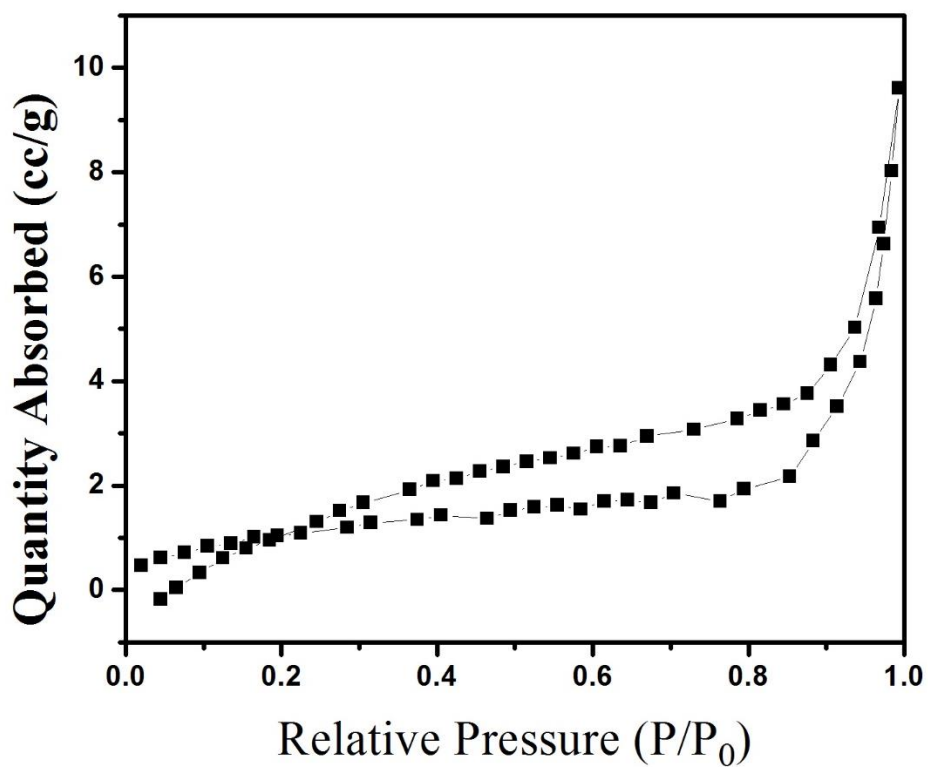

**Figure S3.** Nitrogen adsorption-desorption isotherm of CuS.

| Sample | $S_{\text{BET}}(\text{m}^2\text{g}^{-1})$ | $V_{\text{pore}}(\text{cm}^3\text{g}^{-1})$ |
|--------|-------------------------------------------|---------------------------------------------|
| CuS    | 6.719                                     | 0.017                                       |
